# Supplementary material
Source: PubMed Central journal article supplement (PMC5811085)
Supplement: SC-006-C4SC01320D-s001.pdf [file SC-006-C4SC01320D-s001.pdf]

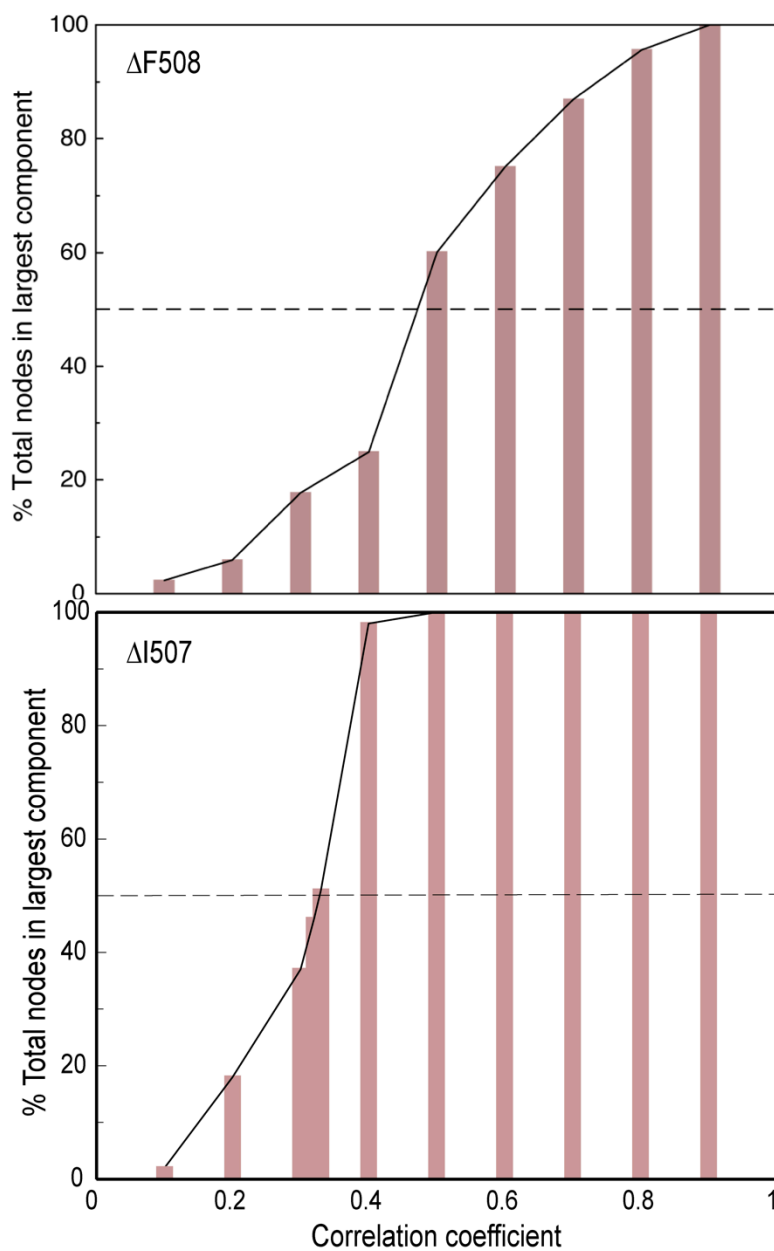

**Figure S1. Choice of cutoffs for disconnected sub-graphs.** Percentage of the total number of nodes in the graph (y-axis) as a function of correlation coefficient (x-axis) for the  $\Delta F508$  (top) and  $\Delta I507$  (bottom) networks. The correlation coefficient at which at least half the total number of nodes in the graph (half of the protein residues) reside in the largest connected component is chosen as a cutoff in generating the disconnected sub-graph. The dashed line represents half of the maximum number of nodes in the graph.

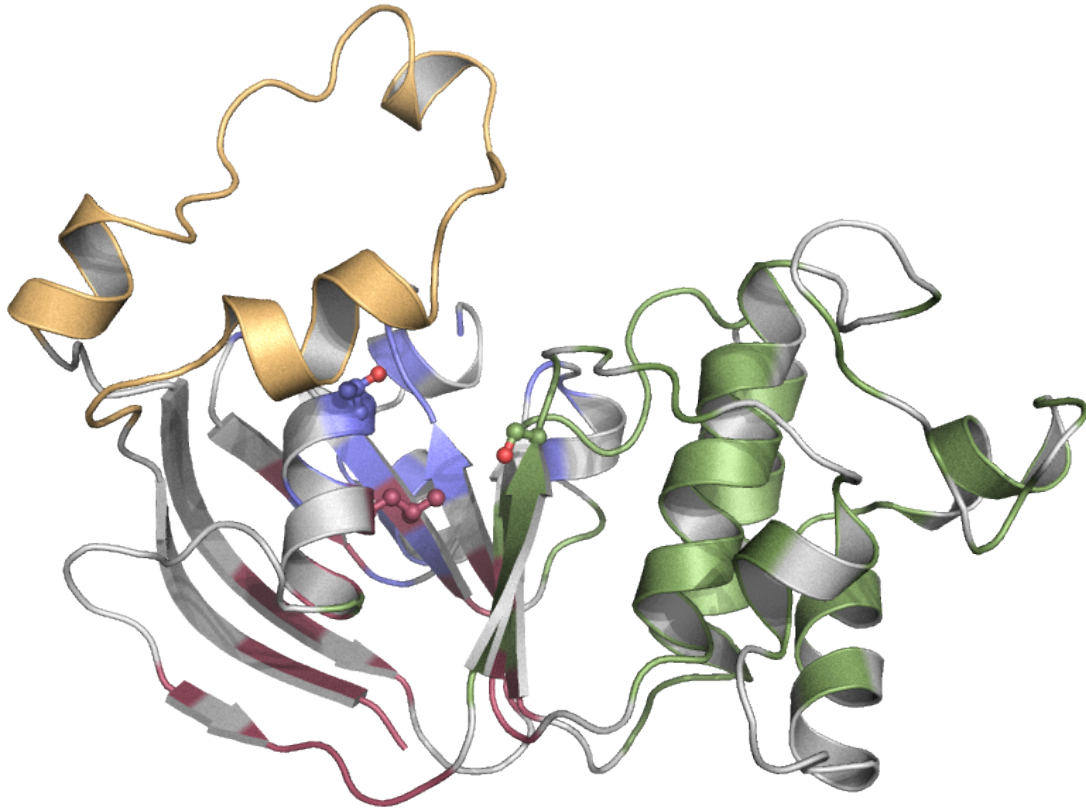

**Figure S2. Regions in NBD1 affected by critical nodes.** Three critical nodes – S492, T465, and L468 – are shown in ball-and-stick representation. S492 influences residues shown in green, T465 influences those shown in blue and red, and L468 influences those in red. Other critical nodes affect subsets of the residues colored red, green, and blue.

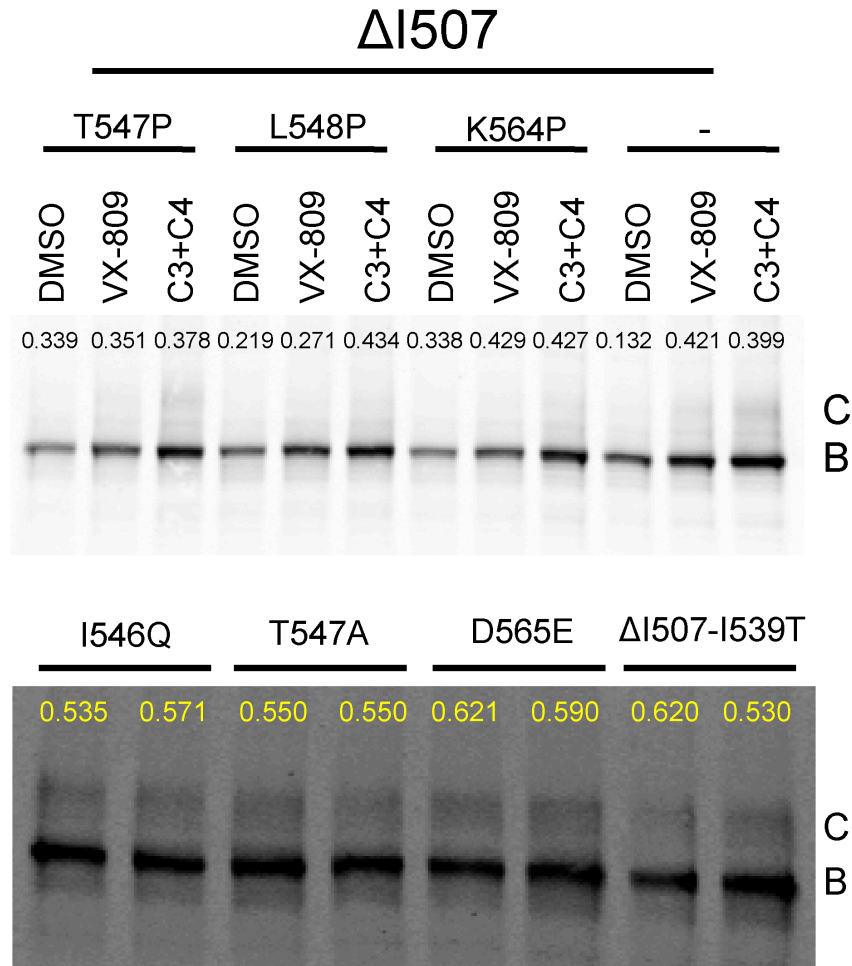

**Figure S3. Mutations to critical nodes affect critical maturation pathways in ΔI507-CFTR.** HEK cells transiently transfected with ΔI507-CFTR with or without additional mutations. We treat cells with indicated correctors 48 hours post-transfection, and grow at 27°C for an additional 24 hours before harvesting for western blot analysis (20 μg proteins/lane). Ratio of C-band to B-band is displayed below each lane.

|        |                                  |                     |
|--------|----------------------------------|---------------------|
| Q07DV2 | <i>Aotus nancymae</i>            | 487-RISFCSQFSWI-497 |
| Q00PJ2 | <i>Atelerix albiventris</i>      | 487-RISFCSQFSWI-497 |
| Q09YK5 | <i>Ateles geoffroyi</i>          | 487-RISFCSQFSWI-497 |
| P35071 | <i>Bos taurus</i>                | 486-RISFCSQYSWI-496 |
| Q2QLB4 | <i>Callicebus moloch</i>         | 487-RISFCSQFSWI-497 |
| Q2QLF9 | <i>Callithrix jacchus</i>        | 487-RISFCSQFSWI-497 |
| Q5U820 | <i>Canis familiaris</i>          | 487-RISFCSQFSWI-497 |
| Q2QLC5 | <i>Carollia perspicillata</i>    | 487-RISFCSQFSWI-497 |
| Q07E05 | <i>Cavia porcellus</i>           | 487-RVSFCSQFSWI-497 |
| Q2IBA1 | <i>Cercopithecus aethiops</i>    | 487-RISFCSQFSWI-497 |
| Q07DY5 | <i>Colobus guereza</i>           | 487-RISFCSQFSWI-497 |
| A0M8W1 | <i>Danio rerio</i>               | 486-RISYSSQTAWI-496 |
| Q07E42 | <i>Dasypus novemcinctus</i>      | 487-RISFCSQFSWI-497 |
| A4ZE37 | <i>Dicentrarchus labrax</i>      | 486-RISFSPQTSWI-496 |
| Q2QL74 | <i>Didelphis marsupialis</i>     | 487-RISFCSQFSWI-497 |
| Q2QLA3 | <i>Equus caballus</i>            | 486-RISFCSQFSWI-496 |
| A0M8T4 | <i>Felis catus</i>               | 487-RISFCSQFSWI-497 |
| A0M8U4 | <i>Gallus gallus</i>             | 488-RISFSPQVSWI-498 |
| Q2IBF6 | <i>Gorilla gorilla</i>           | 487-RISFCSQFSWI-497 |
| P13569 | <i>Homo sapiens</i>              | 487-RISFCSQFSWI-497 |
| Q07DX5 | <i>Hylobates leucogenys</i>      | 487-RISFCSQFSWI-497 |
| Q108U0 | <i>Loxodonta africana</i>        | 487-RISFCSQFSWI-497 |
| Q7JII8 | <i>Macaca fascicularis</i>       | 487-RISFCSQFSWI-497 |
| Q7JII7 | <i>Macaca fuscata</i>            | 487-RISFCSQFSWI-497 |
| Q9TUQ2 | <i>Macaca memestrina</i>         | 487-RISFCSQFSWI-497 |
| Q00553 | <i>Macaca mulatta</i>            | 487-RISFCSQFSWI-497 |
| A4D7T4 | <i>Macropus eugenii</i>          | 487-RISFCSQFSWI-497 |
| Q2QL83 | <i>Microcebus murinus</i>        | 487-RISFCSQFSWI-497 |
| Q09YJ4 | <i>Muntiacus muntjak</i>         | 486-RISFCSQYSWI-496 |
| Q07DW5 | <i>Muntiacus reevesi</i>         | 486-RISFCSQYSWI-496 |
| P26361 | <i>Mus musculus</i>              | 487-RVSFCSQFSWI-497 |
| Q07E16 | <i>Mustela putorius</i>          | 487-RISFCSQFSWI-497 |
| Q07DZ6 | <i>Ornithorhynchus anatinus</i>  | 487-RISFSPQFSWI-497 |
| Q00554 | <i>Oryctolagus cuniculus</i>     | 487-RISFCSQFSWI-497 |
| Q2QLH0 | <i>Otolemus garnettii</i>        | 487-RISFCSQFSWI-497 |
| Q00555 | <i>Ovis aries</i>                | 486-RISFCSQYSWI-496 |
| Q2QLE5 | <i>Pan troglodytes</i>           | 487-RISFCSQFSWI-497 |
| Q9TSP5 | <i>Papio anubis</i>              | 487-RISFCSQFSWI-497 |
| Q2IBE4 | <i>Pongo abelii</i>              | 487-RISFCSQFSWI-497 |
| P34158 | <i>Rattus norvegicus</i>         | 487-RVSFSSQISWI-497 |
| Q2IBB3 | <i>Rhinolophus ferrumequinum</i> | 487-RISFCSQFSWI-497 |
| Q09YH0 | <i>Saimiri boliviensis</i>       | 487-RISFCSQFSWI-497 |
| Q98TY5 | <i>Salmo salar</i>               | 486-RISFSPQTSWI-496 |
| P26362 | <i>Squalus acanthias</i>         | 488-RISYSPQVPWI-498 |
| Q6PQZ2 | <i>Sus scrofa</i>                | 487-RISFCSQFSWI-497 |
| Q5D1Z7 | <i>Trichosurus culpecula</i>     | 487-RISFCSQFSWI-497 |
| P70034 | <i>Xenopus laevis</i>            | 488-RISFSPQVSWI-498 |

**Figure S4. Sequence conservation in CFTR from different species.** Amino acid sequences of CFTR from different species from the Uniprot database. For clarity, an 11 residue window with S492 (or equivalent) as the center of the window is shown. The serine at position 492 (or equivalent) is conserved in other species (red) with a substitution only to proline (green).

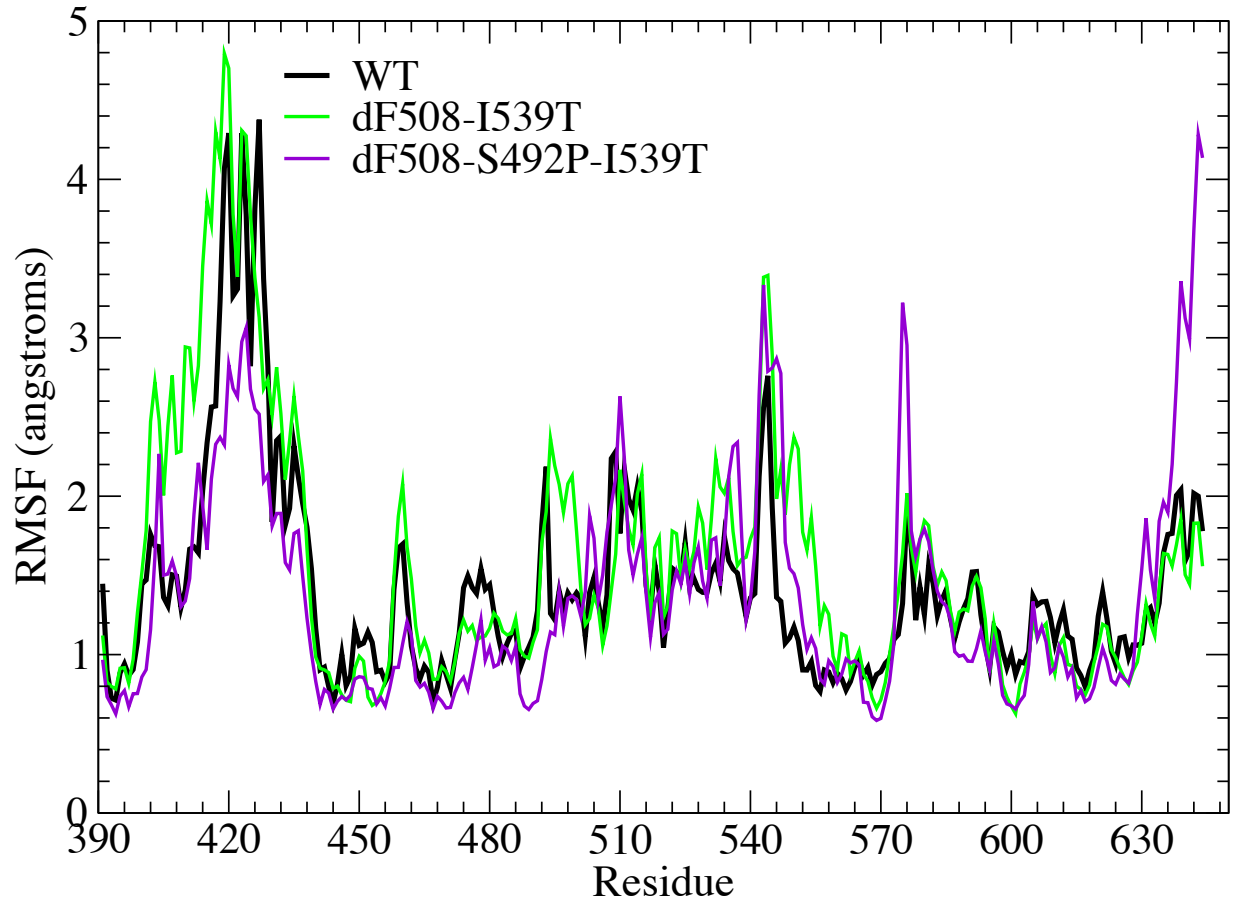

**Figure S5. I539T mutation does not rescue NBD1 dynamics in  $\Delta$ F508-CFTR.** The I539T mutation, commonly used in the experimental setting to affect maturation of  $\Delta$ F508-CFTR, does not return the profile of root mean square fluctuations (RMSF) (green) to wild type levels (black), especially in the dynamic regulatory insertion (RI) region, residues 404-435, and the critical central structure of the domain, residues 490-570. When combined with the S492P substitution (purple), these fluctuations are rescued.

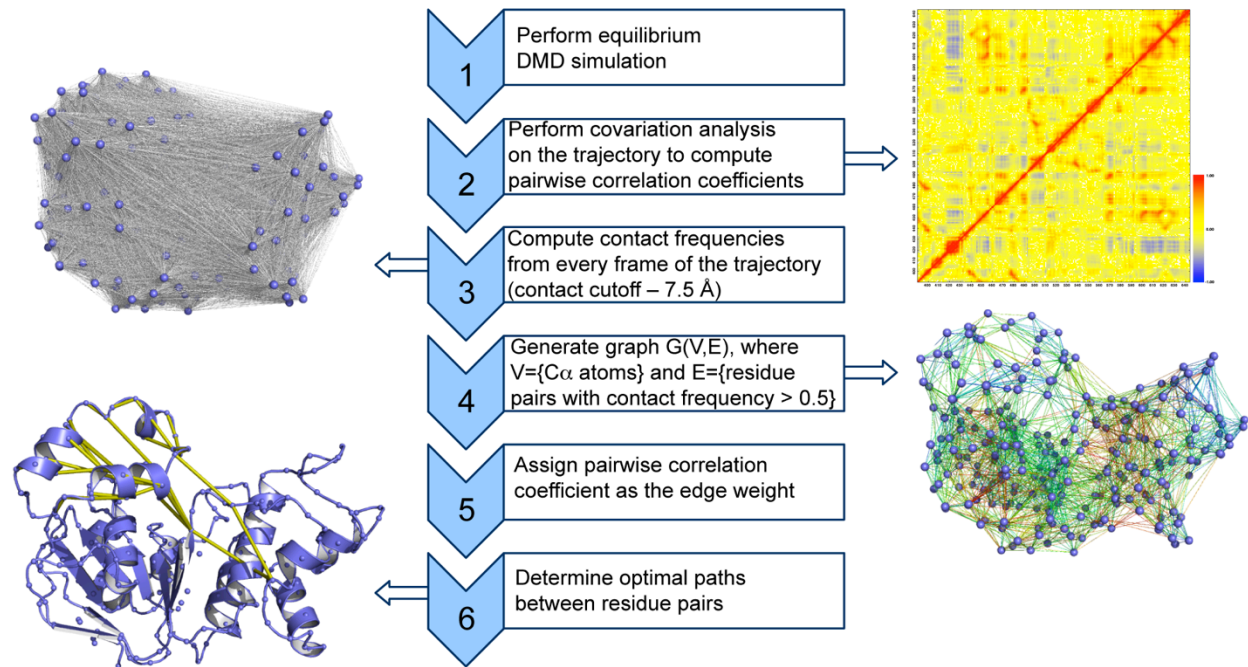

**Figure S6. Computational methodology for determination of allosteric networks.** The flow chart outlines the steps involved in determination of optimal paths between chosen sites in a given protein.

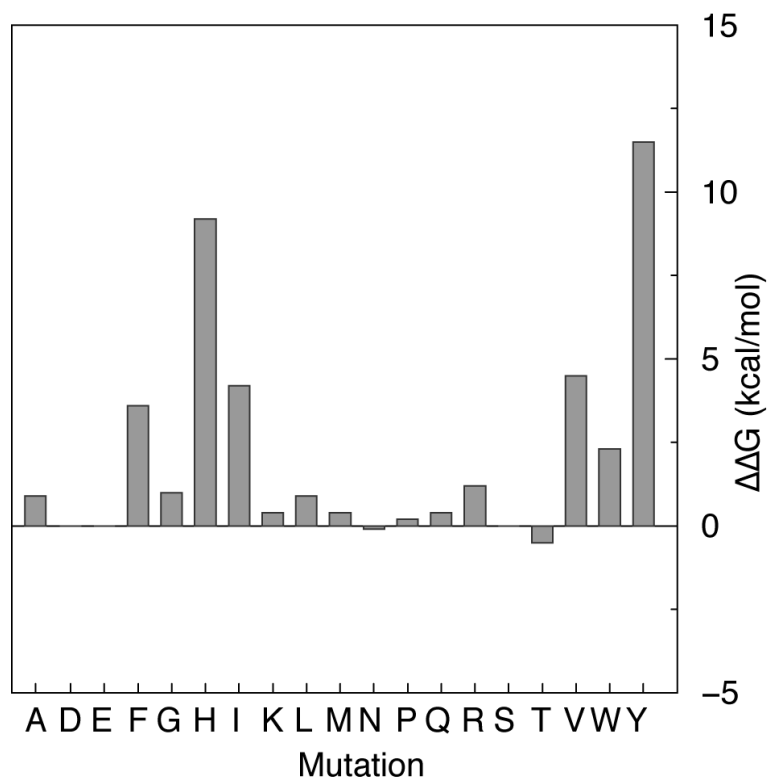

**Figure S7. Exhaustive mutagenesis of S492 does not improve stability.** Change in  $\Delta G$  upon mutation of S492 to various amino acids. Negative values denote stabilizing mutations, while positive values denote destabilizing mutations. Bars represent  $\Delta\Delta G$  values calculated from 500 independent iterations for every substitution.

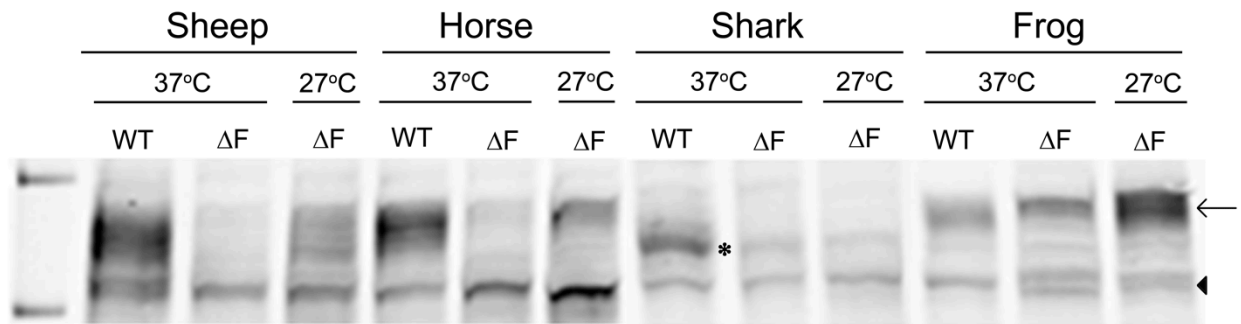

**Figure S8. Effect of F508 deletion on CFTR maturation in various species.** Western blots indicate the extent of maturation of WT and  $\Delta F508$ -CFTRs from the species indicated in HEK-293 cells at 37°C or 27°C. The more rapidly migrating band (arrow) contains the core-glycosylated, endoplasmic reticulum localized form, and the more slowly migrating band contains CFTR with more complex oligosaccharides. The latter form of the shark protein (asterisk) features greater mobility than that of the other species due to the addition of one rather than two N-linked oligosaccharide chains. Like human  $\Delta F508$ -CFTR, the two mammalian proteins mature at the lower but not at the higher temperature, whereas the non-mammalian orthologs mature at both temperatures.



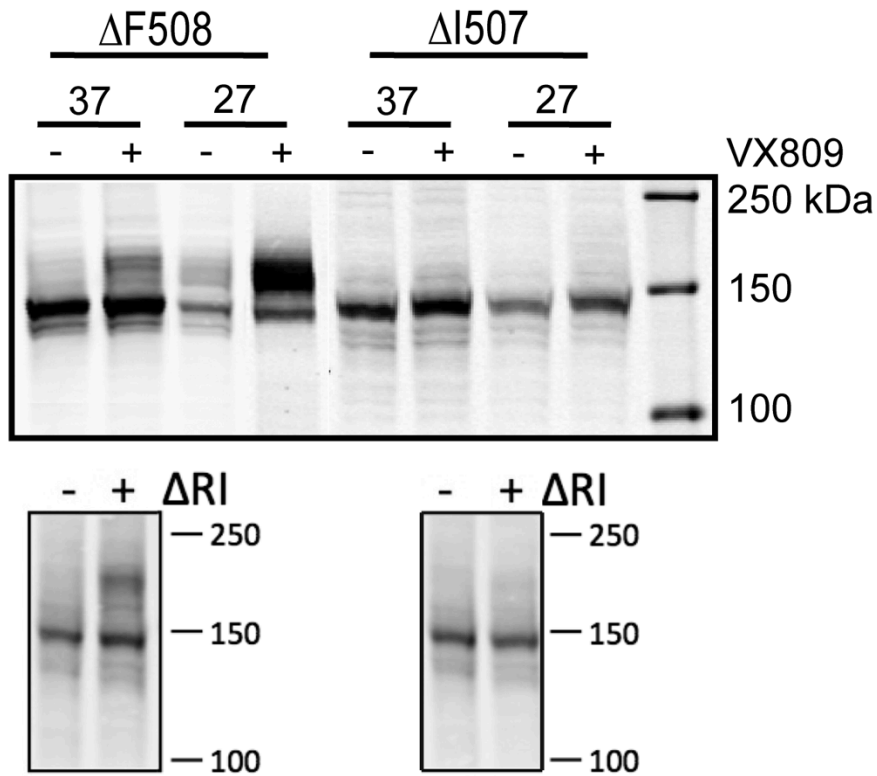

**Figure S9.  $\Delta I507$ -CFTR is not rescued by low temperature or VX809 corrector.** While  $\Delta F508$ -CFTR can be rescued by lowering temperature to 27 °C, treatment with VX809 corrector, or both,  $\Delta I507$ -CFTR is not rescued by either of these treatments, alone or in combination.
